# Supplementary material
Source: PubMed Central journal article supplement (PMC6488228)
Supplement: NIHMS1013997-supplement-Supp_Figures_1-12__Supp_Tables_1-3.pdf [file NIHMS1013997-supplement-Supp_Figures_1-12__Supp_Tables_1-3.pdf]

**Supplementary Information**

**Mechanism of loading and translocation of type VI secretion system  
effector Tse6**

Dennis Quentin, Shehryar Ahmad, Premy Shanthamoorthy, Joseph D Mougous,  
John C Whitney, Stefan Raunser

## Supplementary Figures

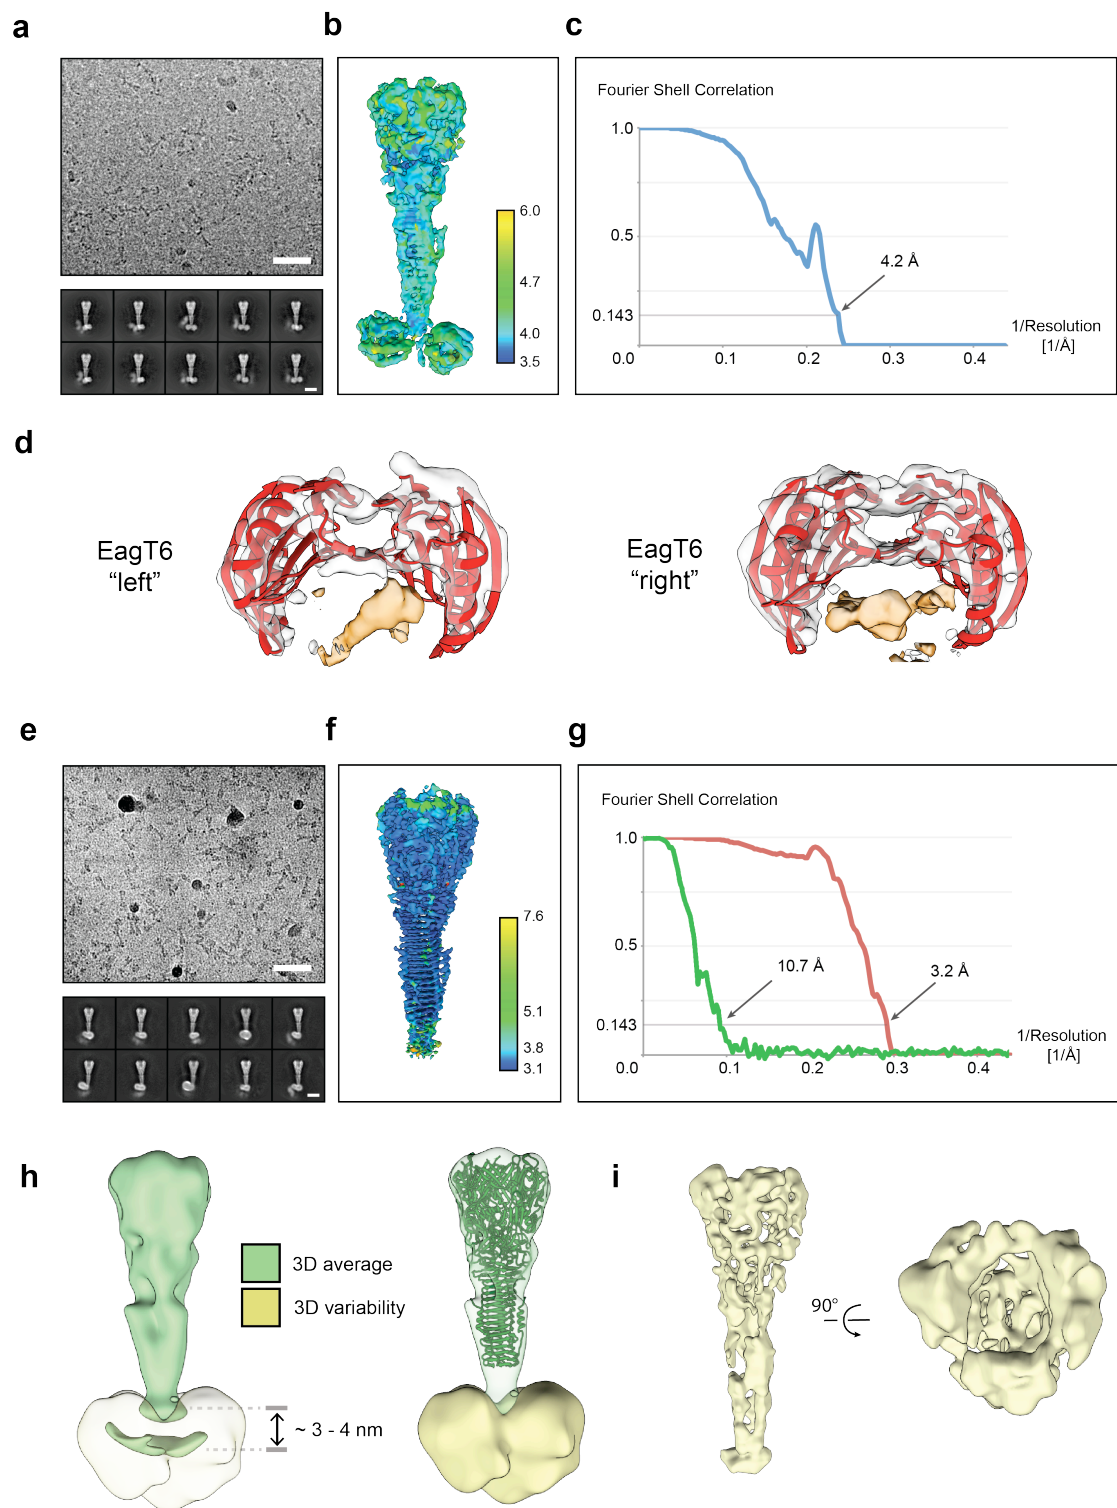

**Supplementary Figure 1. Cryo-EM of the PFC and VgrG1-Tse6-EF-Tu complex in nanodiscs.**

(a) Representative digital micrograph area of vitrified PFC (upper panel, scale bar: 50 nm) with corresponding representative class averages (lower panel, scale bar: 10 nm).

**(b)** Final 3D reconstruction of the PFC, comprising density for VgrG1, Tse6<sub>PAAR</sub>, Tse6<sub>TMDs</sub>, and EagT6<sub>2</sub>, colored by local resolution. **(c)** FSC curve between two independently refined half-maps of the PFC (blue, 55,000 particles). **(d)** Top views of both EagT6 molecules shown with putative TMD density (orange) at different thresholds. EagT6 crystal structure (red) was fitted into EagT6 density (white). **(e)** Representative digital micrograph area of vitrified VgrG1-Tse6-EF-Tu complexes in nanodiscs (upper panel, scale bar: 50 nm) with corresponding representative class averages (lower panel, scale bar: 10 nm). **(f)** Final 3D reconstruction of the VgrG1-Tse6-EF-Tu complex in nanodiscs applying C3 symmetry colored by local resolution. Note that the other proteins of the complex are averaged out, because they do not have C3 symmetry. **(g)** FSC curves between two independently refined half-maps of the upper part of the Tse6-loaded VgrG1 complex in nanodiscs, applying C3 symmetry (red, 72,000 particles) and of a particle subset of the Tse6-loaded VgrG1 complex in nanodiscs in which the nanodisc was almost perpendicular to VgrG1, without applying symmetry (green, 11,000 particles). **(h)** Filtered 3-D average and 3-D variability densities indicate a high flexibility in the nanodisc region (lower part). **(i)** Side and top view of the 3-D reconstruction of the upper region of the VgrG1-Tse6-EF-Tu complex in nanodiscs, applying no symmetry. The strong influence of the nanodisc resulted in a distortion of the density corresponding to C3-symmetric VgrG1.

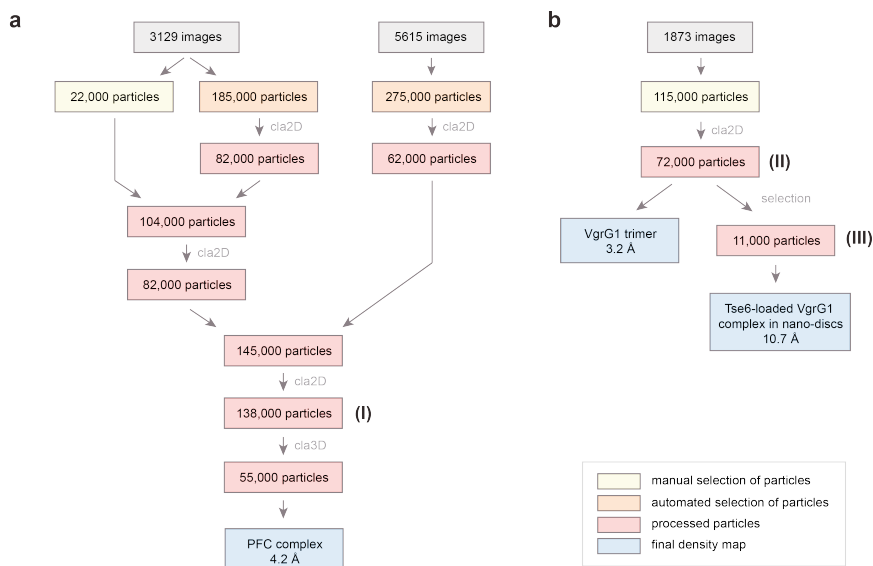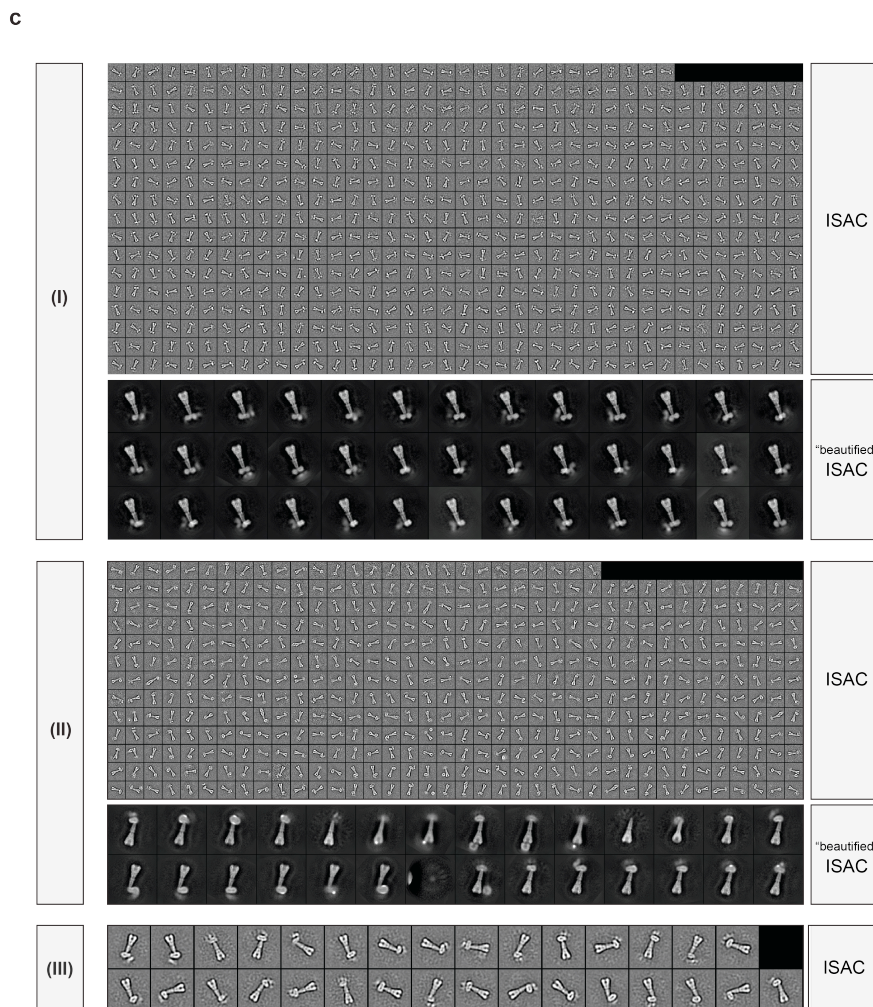

### Supplementary Figure 2. Sorting trees of image processing in SPHIRE.

(a) Consecutive steps of 2-D- and 3-D-image processing for the PFC are shown as flowchart. The number of resulting particles is given after each step. (b) Same as in a for the Tse6-loaded VgrG1 complex in nanodiscs. While all 72,000 particles after 2-D

classification were used to resolve the upper region of the reconstituted complex, only a subset of 11,000 particles, in which the nanodisc was almost perpendicular to VgrG1, was used to obtain structural insights into its overall architecture. **(c)** 2-D class averages of the PFC (I) and Tse6-loaded VgrG1 complex in nanodiscs (II and III) corresponding to the final steps indicated in **a** and **b**. In addition to the binned 2-D class averages produced by ISAC that were used for the selection process, so called “beautified” class averages were calculated, showing unbinned data and thus high-resolution features.

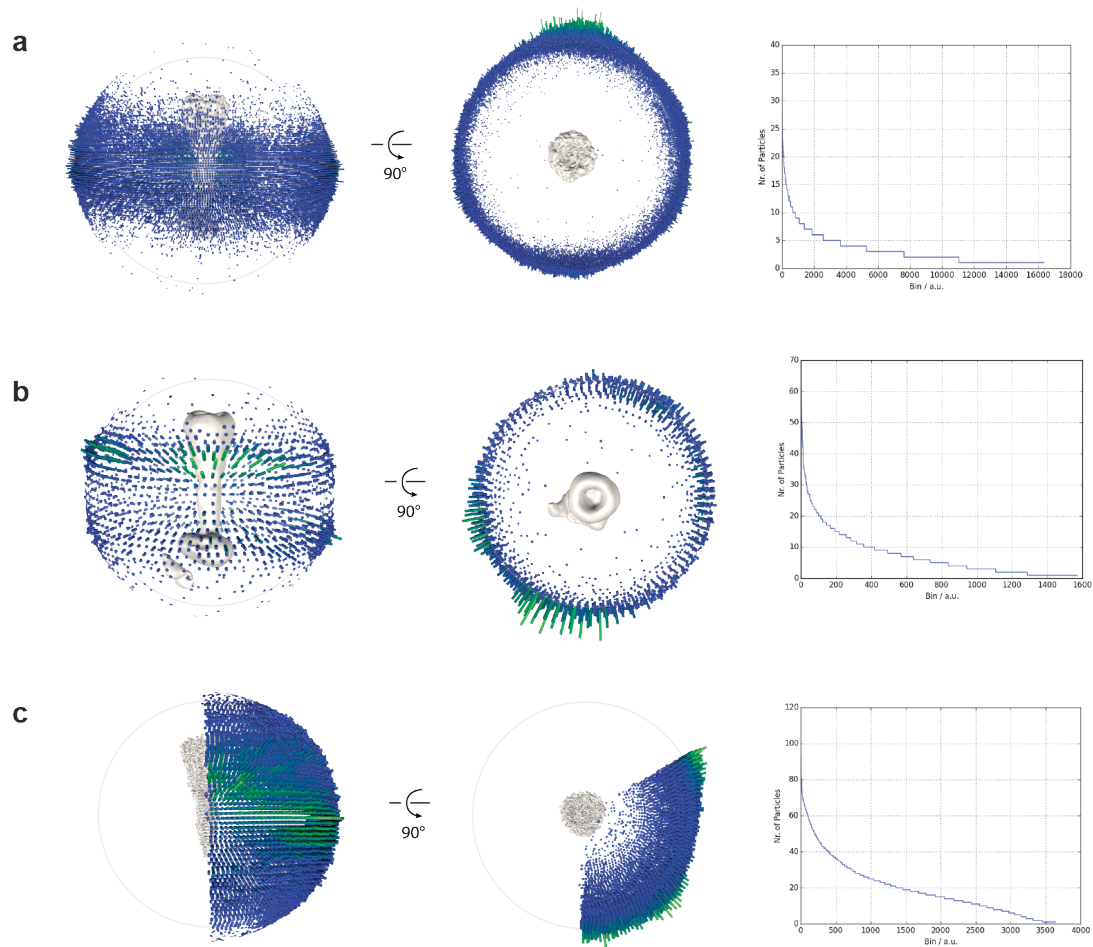

**Supplementary Figure 3. 2-D- and 3-D-projection orientation plots.**

(a) Side and top view of the 3-D angular distribution of PFC particles, in which the relative height of bars represents the number of particles. The corresponding 2-D histogram is shown on the right. (b) Same as in a for the reconstruction of the Tse6-loaded VgrG1 complex in nanodiscs, containing only particles in which the nanodisc is almost perpendicular to VgrG1. (c) Same as in b, except with all particles and C3 symmetry applied.

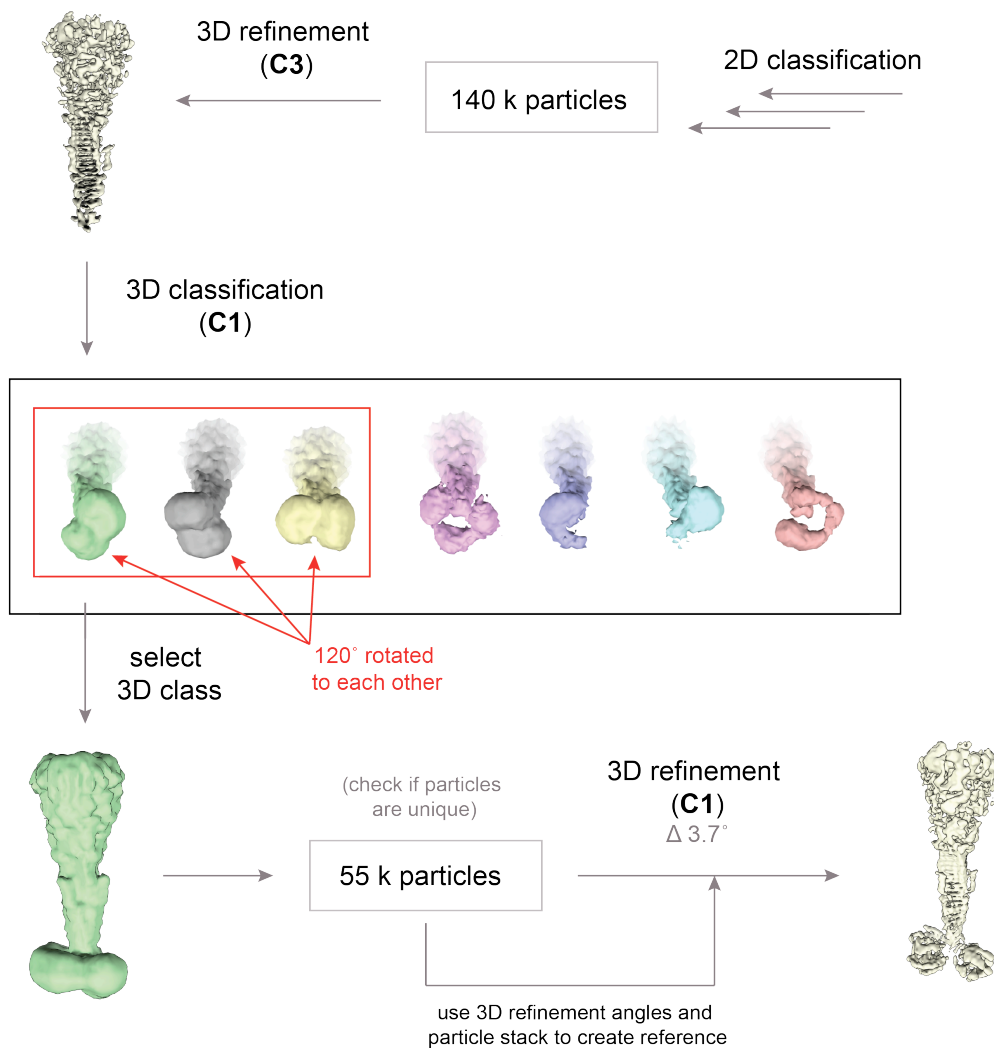

#### Supplementary Figure 4. Flowchart of image processing strategy in SPHIRE.

The 3-D refinement of the PFC was performed by imposing C3-symmetry. The determined three-dimensional projection parameters for each particle were subsequently used to create a symmetrized particle stack. This new stack contained three copies of each original particle with projection parameters rotated 120° along the (C3-) symmetry axis. The subsequent 3-D classification resulted in three volumes that were rotated by 120° to each other. As anticipated, the three copies of the original particle evenly distributed to these classes. However, given that classification procedures are not perfect in reality, we further confirmed that only one copy of the original particle is present in each class. Finally, one of the classes, containing 55,000 particles, was selected and subjected to a new local 3-D refinement without imposing symmetry. This resulted in the 4.2 Å density map of the PFC.

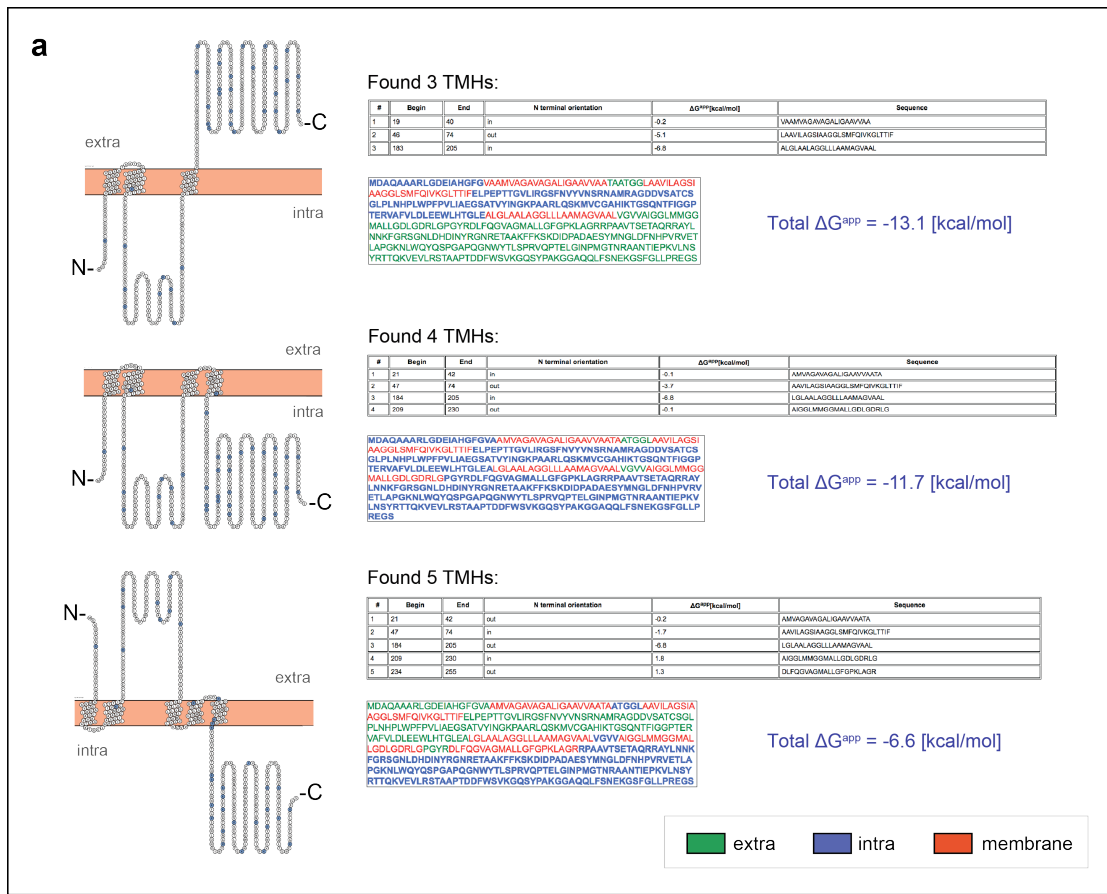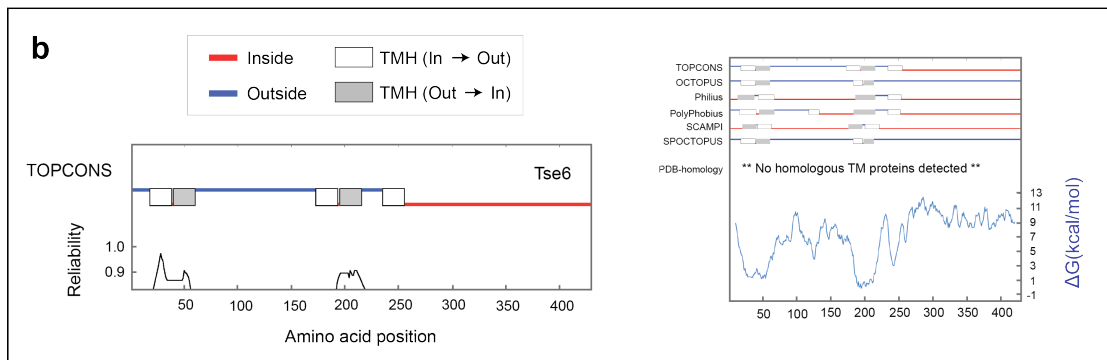

**Supplementary Figure 5. Membrane topology prediction for Tse6.**

(a) Three topology predictions of Tse6 featuring between three and five transmembrane helices (TMHs). The predictions have been obtained by the TopGraph server, which is based on membrane insertion profiles, calculated using sDTBL. (b) TOPCONS consensus predictions of Tse6, combining results of the most common topology prediction servers to generate a consensus prediction of Tse6 topology featuring 5 transmembrane helices.



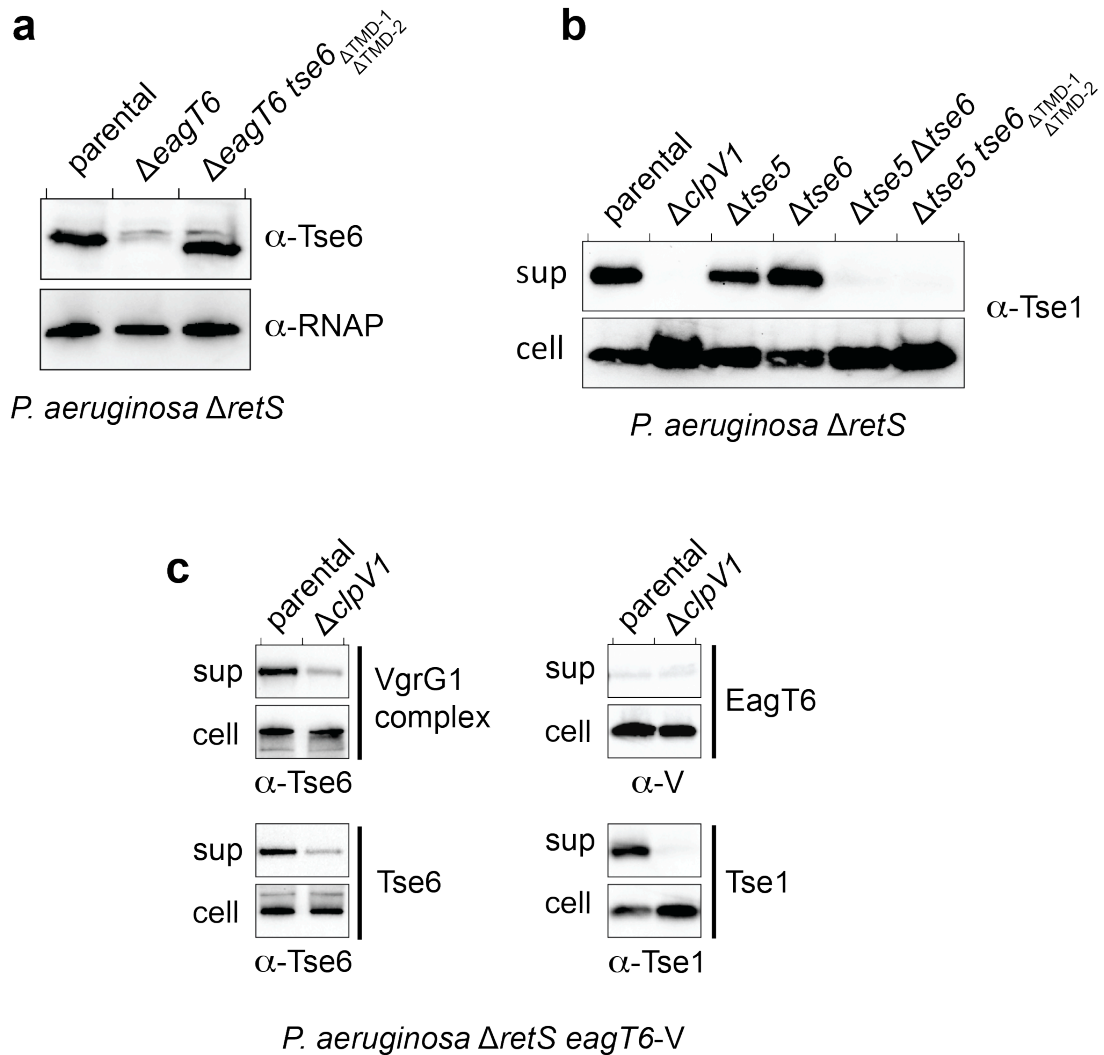

### Supplementary Figure 6. Secretion and growth experiments in *P. aeruginosa*.

(a) Western blot analysis of Tse6 levels in the indicated *P. aeruginosa* strains shows that EagT6 is no longer required for *in vivo* Tse6 stability when both TMDs are deleted. The T6S ATPase ClpV1 provides the energy necessary to drive the secretion apparatus. A strain lacking the ClpV1-encoding gene *clpV1* thus mimics inactivated (H1-) T6SS. (b) Secretion assays of T6S effector Tse1 in *P. aeruginosa*. In the absence of the only two PAAR-containing proteins, Tse5 and Tse6, the T6S apparatus cannot function anymore (no secretion of Tse1). Deletion of both TMDs of Tse6 in a strain lacking *tse5* has the same effect. (c) Secretion assay in the indicated *P. aeruginosa* strains shows that, in contrast to VgrG1, Tse6 and Tse1, EagT6 is not secreted from the cell and is required for the stability of Tse6 but not Tse6 $\Delta_{TMD1} \Delta_{TMD2}$ .

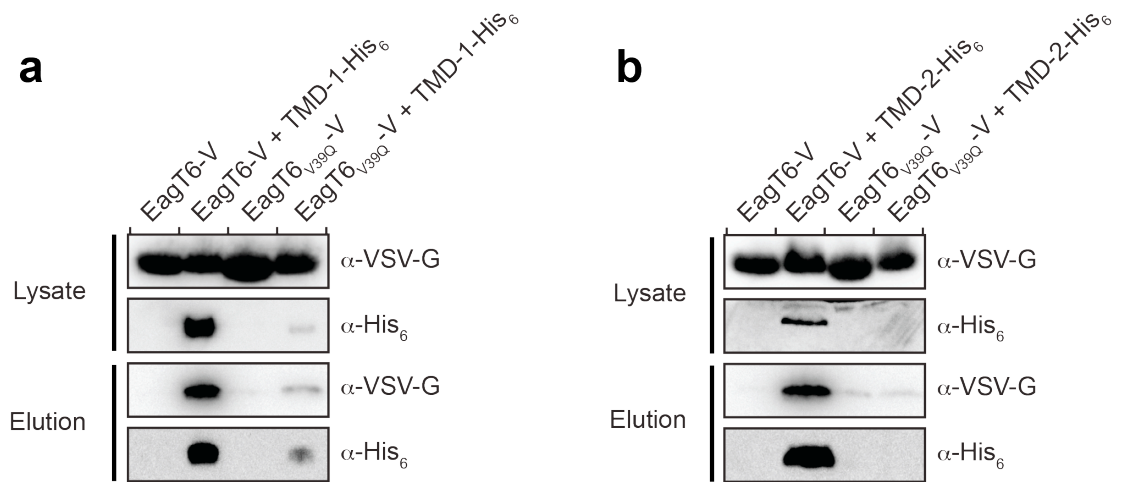

**Supplementary Figure 7. Interaction of EagT6 with the TMDs of Tse6.**

(a) Pull downs of the TMD-1 of Tse6 with EagT6. Western blot analysis of VSV-G and His<sub>6</sub> levels indicate binding of TMD-1 to EagT6. Mutation of valine 39, that is located within the hydrophobic cavity of EagT6, to glutamine abolishes TMD-1 binding. (b) Same as in a for TMD-2. Similar as for TMD-1, EagT6 pulls down with TMD-2 and the V39Q mutation abolishes binding.

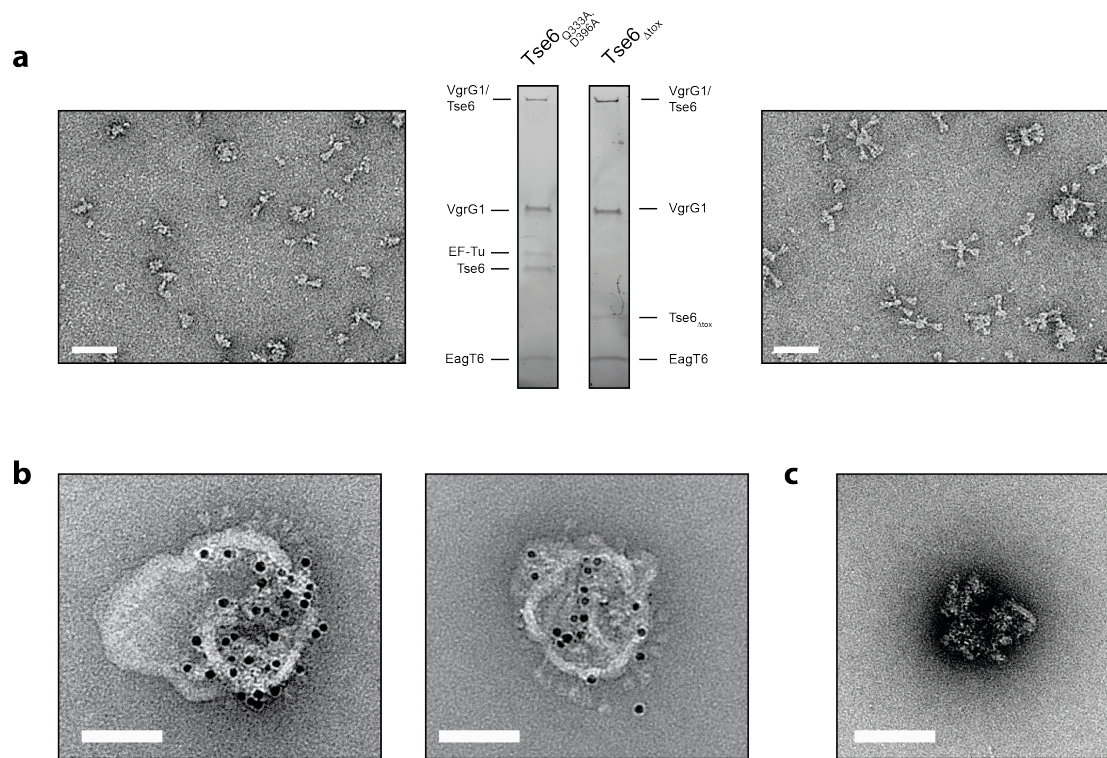

**Supplementary Figure 8. Catalytically inactive and toxin-domain lacking mutants of Tse6.**

(a) Representative negatively stained electron micrograph areas of complexes containing a catalytically inactive Tse6 double mutant (Tse6<sup>Q333A, D396A</sup>) (left panel) and a Tse6 mutant lacking its C-terminal toxin domain (Tse6<sub>Δtox</sub>) (right panel). Corresponding SDS-PAGE is shown in the middle. Scale bars: 50 nm. (b) Electron micrograph area showing Tse6-loaded VgrG1 complex reconstituted in liposomes and labeled with 5 nm NTA-coated nanogold. Scale bar: 50 nm. (c) Electron micrograph area showing liposome fraction after incubation with Tse6<sub>Δtox</sub>-loaded VgrG1 complex. Complexes lacking Tse6<sub>tox</sub> do not readily insert into the lipid bilayer of liposomes. Scale bar: 100 nm.

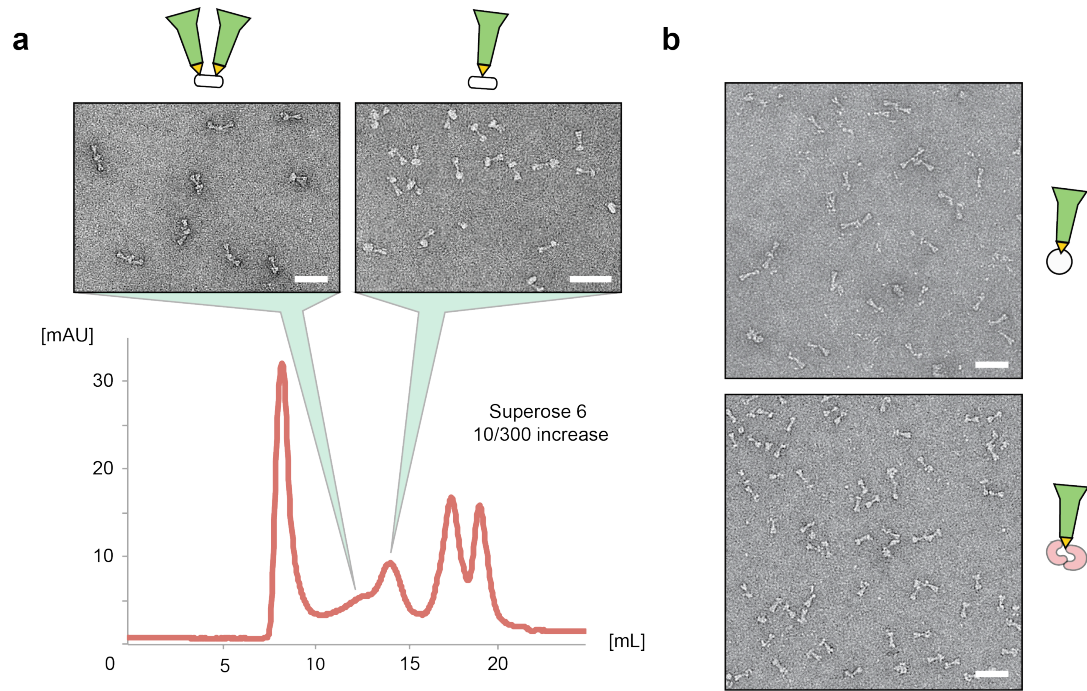

**Supplementary Figure 9. Purification of the Tse6-loaded VgrG1 complex after reconstitution into nanodiscs.**

(a) Size exclusion chromatography of Tse6-loaded VgrG1 reconstituted into preformed nanodiscs (MSP1D1- $\Delta$ H5). Representative areas of negatively stained micrographs of fractions containing the complex in nanodiscs are shown. Scale bars: 50 nm. (b) Representative micrographs of Tse6-loaded VgrG1 complex in detergent (upper panel) and PFC (lower panel). Scale bars: 50 nm.

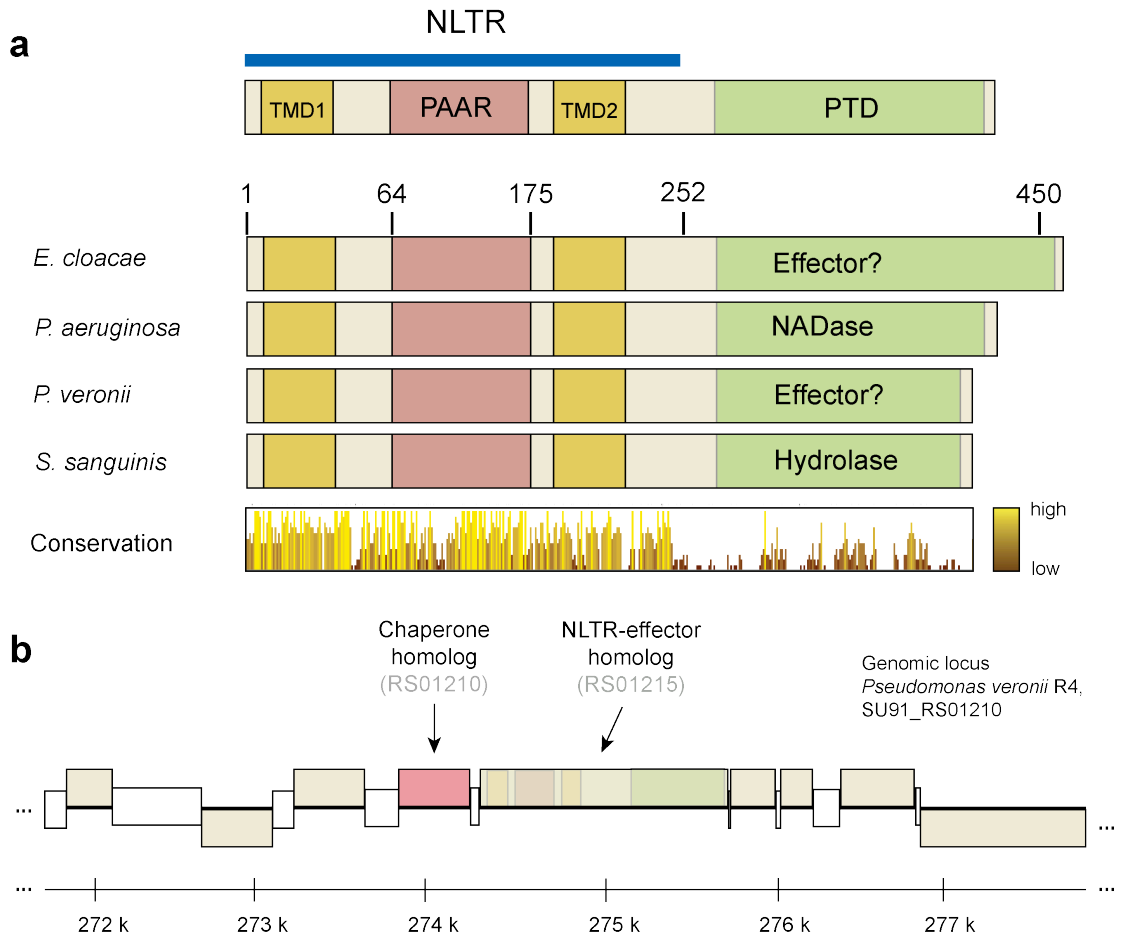

**Supplementary Figure 10. Conserved domain architecture of the N-terminal loading and translocation region of T6S effectors.**

(a) Comparison of the domain organization (top) and multiple sequence alignment (bottom) of T6S effectors of selected members of the *Proteobacteria* phylum shows conservation of the N-terminal loading and translocation region (NLTR, blue) and high variability of the C-terminal polymorphic toxin domain (PTD, green). The core of the NLTR is formed by the transmembrane domains (TMD1, TMD2, yellow) and the PAAR domain (dark red). (b) Genomic context in *P. veronii* R4 of a homologue of Tse6 and its respective chaperone, homologous to EagT6. The gene coding for the chaperone is located upstream of NLTR-effector gene. The colors of NLTR-effector gene, indicating domains are the same as in a.

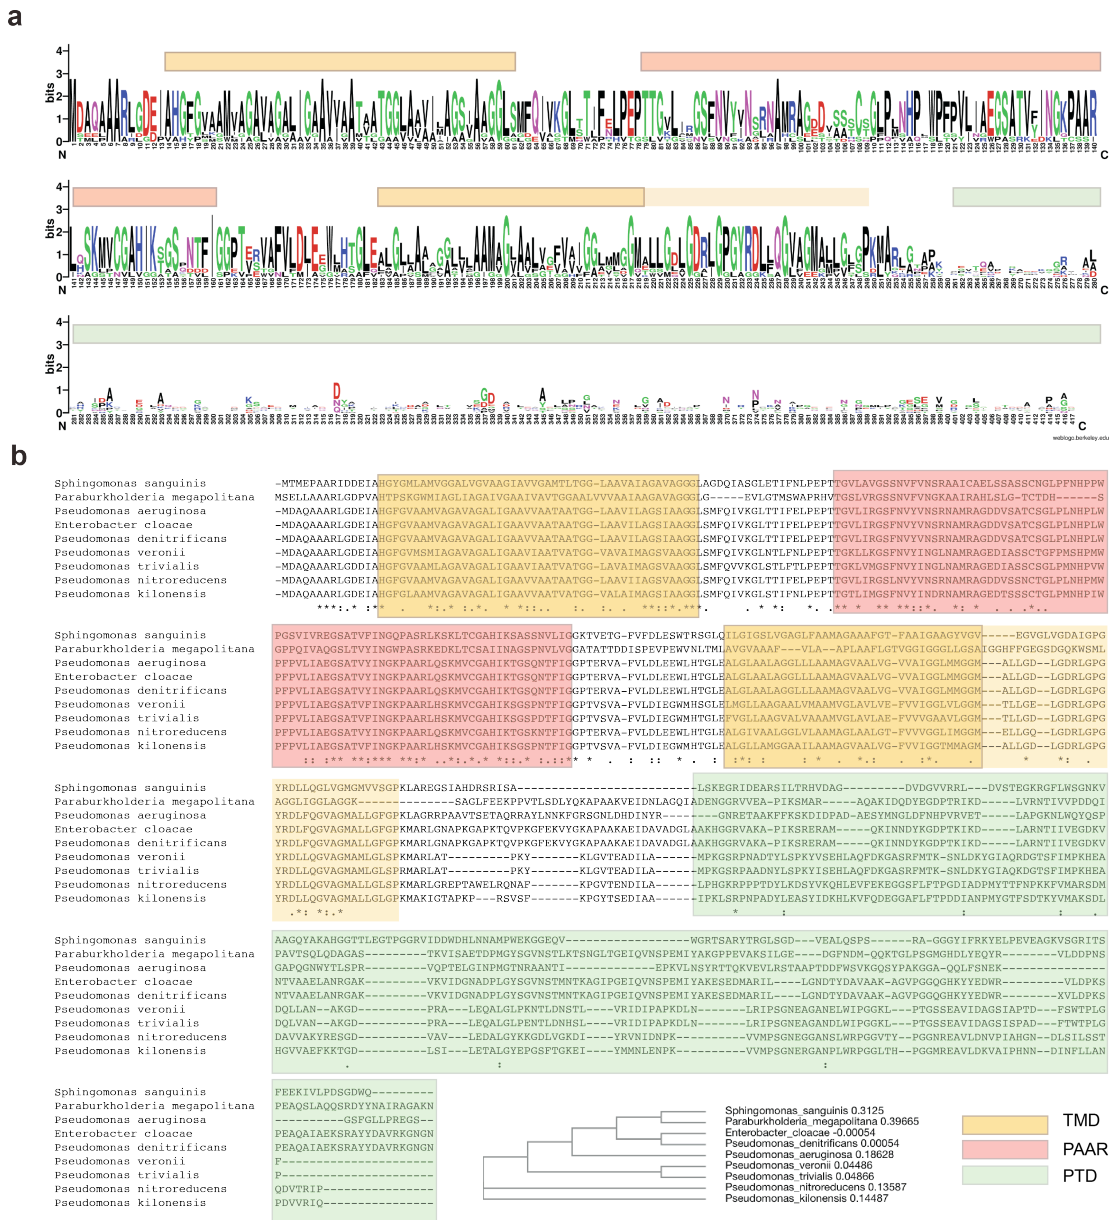

**Supplementary Figure 11. Multiple sequence alignment highlights conservation of NTLR domain.**

(a) Graphical representation (WebLogo) based on a multiple sequence alignment of selected members of  $\alpha$ -,  $\beta$ - and  $\gamma$ - *proteobacteria*. Predicted domain boundaries are illustrated with colored boxes above the logos. TMDs are shown in orange, the PAAR domains in red and the PTD in green. (b) Multiple sequence alignment (Clustal Omega) of nine selected Gram-negative bacteria with corresponding phylogenetic tree, highlighting the conservation of the NTLR. Color code as in a.

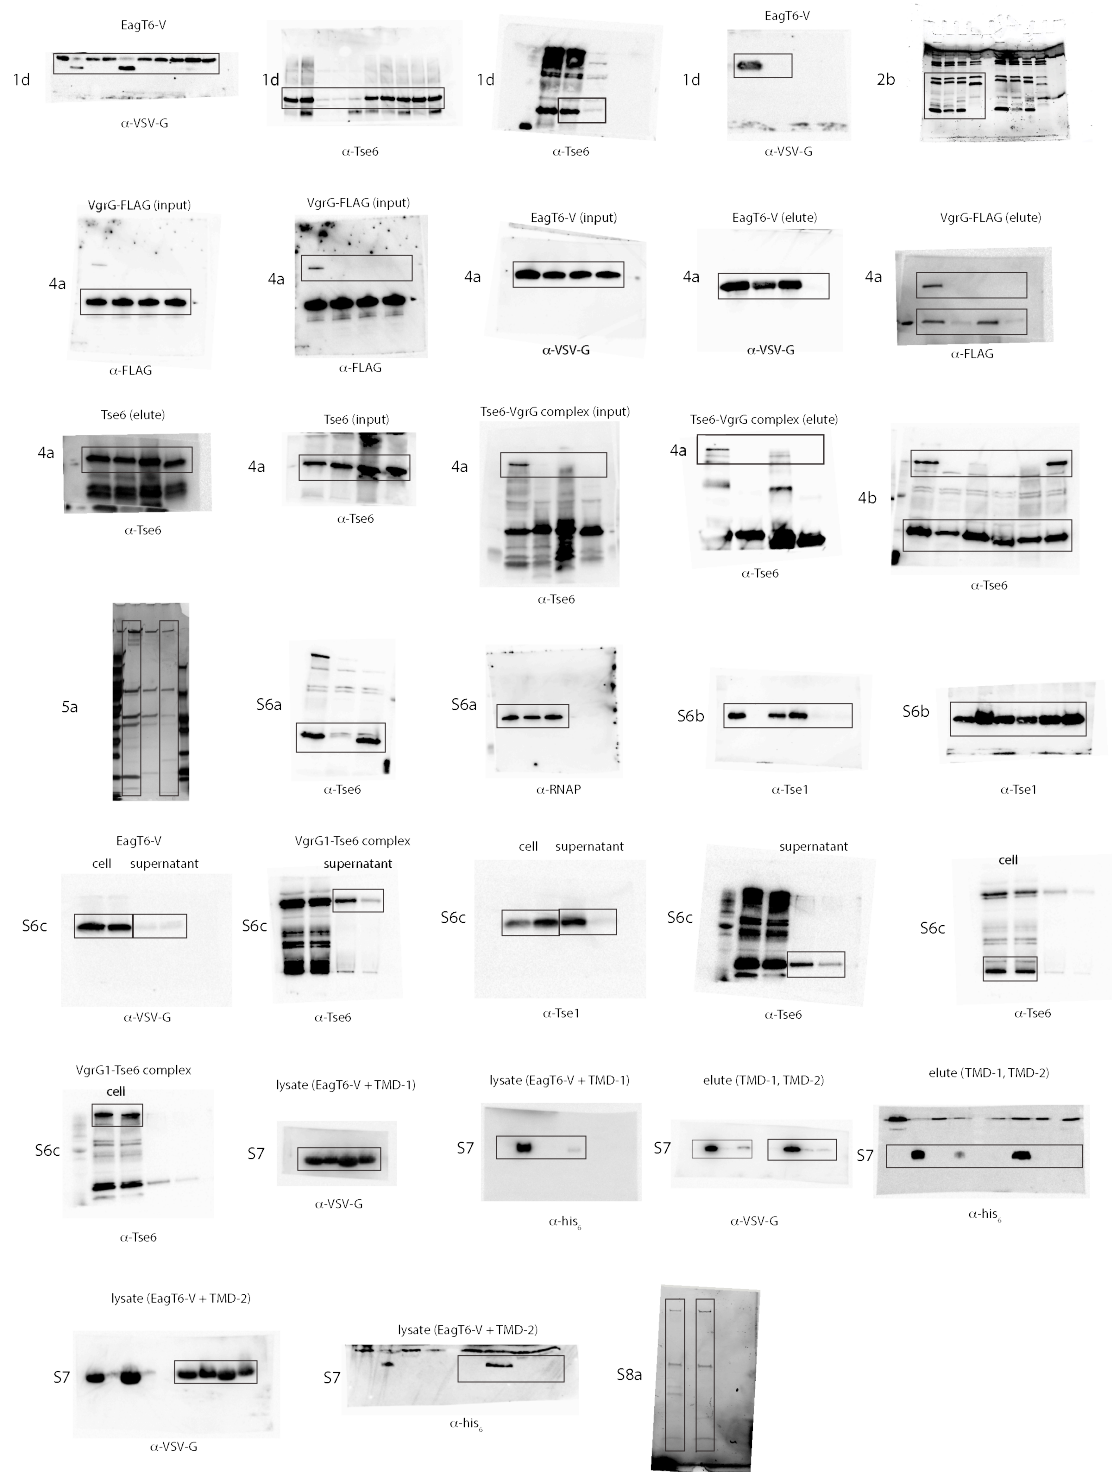

**Supplementary Figure 12. Full-length raw versions of gels and blots.**

Unmanipulated full-length versions of all gel- and blot- images with corresponding figure numbers. Sections that are shown are highlighted with black boxes.

## Supplementary Tables

**Supplementary Table 1. Model refinement of VgrG1 in the PFC and VgrG1-Tse6-EF-Tu complex in nanodiscs.**

|                       | PFC                      |                             |                                                 | VgrG1-Tse6-EF-Tu complex in ND |                             |                                                 |                             |                                                 |
|-----------------------|--------------------------|-----------------------------|-------------------------------------------------|--------------------------------|-----------------------------|-------------------------------------------------|-----------------------------|-------------------------------------------------|
|                       | 4MTK<br>(incl. B-factor) | C1-Refinement<br>C1-Rosetta | C1-Refinement<br>C1-Rosetta<br>(incl. B-factor) | 4MTK<br>(incl. B-factor)       | C3-Refinement<br>C1-Rosetta | C3-Refinement<br>C1-Rosetta<br>(incl. B-factor) | C3-Refinement<br>C3-Rosetta | C3-Refinement<br>C3-Rosetta<br>(incl. B-factor) |
| Wt                    | 25                       | 25                          | 25                                              | 25                             | 25                          | 25                                              | 25                          | 25                                              |
| Ramachandran Outliers | 0.05                     | 0.91                        | 0.91                                            | 0.05                           | 0.7                         | 0.7                                             | 2.09                        | 2.09                                            |
| Ramachandran Favored  | 96.09                    | 91.44                       | 91.44                                           | 96.09                          | 94.65                       | 94.65                                           | 91.17                       | 91.17                                           |
| Rotamer Outliers      | 5.45                     | 0.06                        | 0.06                                            | 5.45                           | 0.0                         | 0.0                                             | 0.95                        | 0.95                                            |
| C-beta Deviation      | 0.0                      | 0.0                         | 0.0                                             | 0.0                            | 0.0                         | 0.0                                             | 0.0                         | 0.0                                             |
| Clashscore            | 10.06                    | 4.50                        | 4.50                                            | 9.82                           | 1.26                        | 1.26                                            | 1.71                        | 1.71                                            |
| RMS Bonds             | 0.0038                   | 0.0152                      | 0.0152                                          | 0.0037                         | 0.0145                      | 0.0145                                          | 0.0143                      | 0.0143                                          |
| RMS Angles            | 1.17                     | 1.53                        | 1.53                                            | 1.17                           | 1.35                        | 1.35                                            | 1.26                        | 1.26                                            |
| Mol Probrity Score    | 2.35                     | 1.73                        | 1.73                                            | 2.34                           | 1.22                        | 1.22                                            | 1.44                        | 1.44                                            |
| EM Ringer Score       | 0.533135                 | 0.461668                    | 0.461668                                        | 2.951283                       | 4.548322                    | 4.548322                                        | 4.283487                    | 4.283487                                        |
| FSC Work              | 0.205372                 | 0.311012                    | 0.31492                                         | 0.578509                       | 0.594187                    | 0.606926                                        | 0.594811                    | 0.602522                                        |
| FSC Free              | 0.191802                 | 0.286383                    | 0.29067                                         | 0.5771                         | 0.576787                    | 0.582562                                        | 0.572111                    | 0.575408                                        |



**Supplementary Table 2. Strains used in this study.**

| Organism                            | Genotype                                                                                                                       | Description                                                                                                                  | Reference              |
|-------------------------------------|--------------------------------------------------------------------------------------------------------------------------------|------------------------------------------------------------------------------------------------------------------------------|------------------------|
| <i>P. aeruginosa</i><br>PAO1        | wild-type                                                                                                                      |                                                                                                                              | Stover et al., 2000    |
|                                     | ΔPA4856                                                                                                                        | <i>retS</i> deletion parent strain                                                                                           | Goodman et al., 2004   |
|                                     | ΔPA4856 attB::lacZ                                                                                                             | Constitutive <i>lacZ</i> expression strain, Tet <sup>R</sup>                                                                 | Whitney et al., 2014   |
|                                     | ΔPA4856 ΔPA0092 ΔPA0093 attB::lacZ                                                                                             | <i>tse6 tsi6</i> deletion strain constitutively expressing <i>lacZ</i> , Tet <sup>R</sup>                                    | Whitney et al., 2014   |
|                                     | ΔPA4856 ΔPA0090                                                                                                                | <i>clpV1</i> deletion strain                                                                                                 | Hood et al., 2010      |
|                                     | ΔPA4856 ΔPA0094                                                                                                                | <i>eagT6</i> deletion strain                                                                                                 | Whitney et al., 2015   |
|                                     | ΔPA4856 ΔPA4427                                                                                                                | <i>sspB</i> deletion strain                                                                                                  | Silverman et al., 2013 |
|                                     | ΔPA4427 ΔPA4856 <i>tsi6</i> -D4                                                                                                | <i>sspB</i> deletion strain expressing Tsi6 with a C-terminal DAS+4 tag                                                      | Whitney et al., 2015   |
|                                     | ΔPA4856 ΔPA4427 PA0093 ΔTMD-1 ΔTMD-2                                                                                           | <i>sspB</i> deletion strain expressing Tse6 variant lacking residues 2-61 and 180-222                                        | This study             |
|                                     | ΔPA4427 ΔPA4856 <i>tsi6</i> -D4 PA0093 ΔTMD-1 ΔTMD-2                                                                           | <i>sspB</i> deletion strain expressing Tsi6 with a C-terminal DAS+4 tag and a Tse6 variant lacking residues 2-61 and 180-222 | This study             |
|                                     | ΔPA4856 PA0094-V                                                                                                               | Expresses EagT6 fused to a C-terminal VSV-G epitope tag                                                                      | Whitney et al., 2015   |
|                                     | ΔPA4856 ΔPA0090 PA0094-V                                                                                                       | <i>clpV1</i> deletion strain expressing EagT6 with a C-terminal VSV-G tag                                                    | Whitney et al., 2015   |
|                                     | ΔPA4856 PA0094-V_L3Q                                                                                                           | Expresses EagT6_L3Q variant                                                                                                  | This study             |
|                                     | ΔPA4856 PA0094-V_Q20A                                                                                                          | Expresses EagT6_Q20A variant                                                                                                 | This study             |
|                                     | ΔPA4856 PA0094-V_I22Q                                                                                                          | Expresses EagT6_I22Q variant                                                                                                 | This study             |
|                                     | ΔPA4856 PA0094-V_R34A                                                                                                          | Expresses EagT6_R34A variant                                                                                                 | This study             |
|                                     | ΔPA4856 PA0094-V_V39Q                                                                                                          | Expresses EagT6_V39Q variant                                                                                                 | This study             |
|                                     | ΔPA4856 PA0094-V_D48A                                                                                                          | Expresses EagT6_D48A variant                                                                                                 | This study             |
|                                     | ΔPA4856 PA0094-V_K64A                                                                                                          | Expresses EagT6_K64A variant                                                                                                 | This study             |
|                                     | ΔPA4856 PA0094-V_T115Q                                                                                                         | Expresses EagT6_T115Q variant                                                                                                | This study             |
|                                     | ΔPA4856 PA0094-V_H125A                                                                                                         | Expresses EagT6_H125A variant                                                                                                | This study             |
|                                     | ΔPA4856 PA0094-V_R140A                                                                                                         | Expresses EagT6_R140A variant                                                                                                | This study             |
|                                     | ΔPA4856 PA0093 ΔTMD-1                                                                                                          | Expresses Tse6 variant lacking residues 2-61                                                                                 | This study             |
|                                     | ΔPA4856 PA0093 ΔTMD-2                                                                                                          | Expresses Tse6 variant lacking residues 180-222                                                                              | This study             |
|                                     | ΔPA4856 PA0093 ΔTMD-1 ΔTMD-2                                                                                                   | Expresses Tse6 variant lacking residues 2-61 and 180-222                                                                     | This study             |
|                                     | ΔPA4856 ΔPA0091                                                                                                                | <i>vgrG1</i> deletion strain                                                                                                 | Whitney et al., 2014   |
|                                     | ΔPA4856 ΔPA2685                                                                                                                | <i>vgrG4</i> deletion strain                                                                                                 | This study             |
|                                     | ΔPA4856 ΔPA0094 PA0093 ΔTMD-1 ΔTMD-2                                                                                           | <i>eagT6</i> deletion strain expressing Tse6 variant lacking residues 2-61 and 180-222                                       | This study             |
|                                     | ΔPA4856 ΔPA2684                                                                                                                | <i>tse5</i> deletion strain                                                                                                  | This study             |
|                                     | ΔPA4856 ΔPA0093                                                                                                                | <i>tse6</i> deletion strain                                                                                                  | Whitney et al., 2014   |
| ΔPA4856 ΔPA2684 ΔPA0093             | <i>tse5 tse6</i> deletion strain                                                                                               | This study                                                                                                                   |                        |
| ΔPA4856 ΔPA2684                     | <i>tse5</i> deletion strain expressing Tse6 variant lacking residues 2-61 and 180-222                                          | This study                                                                                                                   |                        |
| ΔPA0093 ΔTMD-1 ΔTMD-2               |                                                                                                                                |                                                                                                                              |                        |
| <i>E. coli</i> SM10 λpir            | Km <sup>R</sup> , <i>thi-1 thr leu tonA lac Y supE recA::RP4-2-Tc::Mu</i> , pir                                                | Conjugation strain                                                                                                           | BioMedal LifeScience   |
| <i>E. coli</i> XL-1 Blue            | <i>recA1 endA1 gyrA96 thi-1 hsdR17 supE44 relA1 lac</i> [F' <i>proAB lac<sup>R</sup> ΔAM15 Tn10</i> (Tet <sup>R</sup> )]       | Cloning strain                                                                                                               | Agilent                |
| <i>E. coli</i> BL21 (DE3) CodonPlus | F <sup>+</sup> ompT gal dcm lon hsdS <sub>B</sub> (r <sub>B</sub> <sup>-</sup> m <sub>B</sub> ) λ(DE3) pLysS(cm <sup>R</sup> ) | Protein expression strain                                                                                                    | Novagen                |

**Supplementary Table 3. Plasmids used in this study.**

| Plasmid                                   | Relevant features                                                                                               | Reference                 |
|-------------------------------------------|-----------------------------------------------------------------------------------------------------------------|---------------------------|
| pEXG2                                     | Allelic replacement vector containing <i>sacB</i> , Gm <sup>R</sup>                                             | Rietsch et al., 2005      |
| pPSV35-CV                                 | Expression vector with <i>lacI</i> , <i>lacUV5</i> promoter, C-terminal VSV-G tag, Gm <sup>R</sup>              | Mougous et al., 2006      |
| pPSV38-CV                                 | Expression vector with <i>lacI</i> , <i>lacUV5</i> promoter, C-terminal VSV-G tag, Gm <sup>R</sup>              | Castang et al., 2008      |
| pSCRhaB2-CV                               | Expression vector with <i>PrhaB</i> , Tmp <sup>R</sup>                                                          | Cardona and Valvano, 2005 |
| pETDuet-1                                 | Co-expression vector with <i>lacI</i> , T7 promoter, N-terminal His <sub>6</sub> tag in MCS-1, Amp <sup>R</sup> | Novagen                   |
| pRSFDuet-1                                | Co-expression vector with <i>lacI</i> , T7 promoter, N-terminal His <sub>6</sub> tag in MCS-1, Kan <sup>R</sup> | Novagen                   |
| pEXG2::PA0092_DAS+4                       | For generating strains encoding Tsi6 with a C-terminal DAS+4 tag (DENYSENYADAS)                                 | Whitney et al., 2015      |
| pEXG2::PA0093_ΔTMD-1                      | For generating strains encoding Tse6 lacking residues 2-61                                                      | This study                |
| pEXG2::PA0093_ΔTMD-2                      | For generating strains encoding Tse6 lacking residues 180-222                                                   | This study                |
| pEXG2::PA0093_ΔTMD-1_ΔTMD-2               | For generating strains encoding Tse6 lacking residues 2-61 and 180-222                                          | This study                |
| pEXG2::ΔPA0094*                           | Alternate <i>eagT6</i> deletion allele in pEXG2. 3' flank lacks region of <i>tse6</i> encoding residues 2-61    | This study                |
| pEXG2::PA0094_L3Q                         | For generating strains encoding EagT6 L3Q point mutant                                                          | This study                |
| pEXG2::PA0094_Q20A                        | For generating strains encoding EagT6 Q20A point mutant                                                         | This study                |
| pEXG2::PA0094_I22Q                        | For generating strains encoding EagT6 I22Q point mutant                                                         | This study                |
| pEXG2::PA0094_R34A                        | For generating strains encoding EagT6 R34A point mutant                                                         | This study                |
| pEXG2::PA0094_V39A                        | For generating strains encoding EagT6 V39A point mutant                                                         | This study                |
| pEXG2::PA0094_D48A                        | For generating strains encoding EagT6 D48A point mutant                                                         | This study                |
| pEXG2::PA0094_K64A                        | For generating strains encoding EagT6 K64A point mutant                                                         | This study                |
| pEXG2::PA0094_T115Q                       | For generating strains encoding EagT6 T115Q point mutant                                                        | This study                |
| pEXG2::PA0094_H125A                       | For generating strains encoding EagT6 H125A point mutant                                                        | This study                |
| pEXG2::PA0094_R140A                       | For generating strains encoding EagT6 R140A point mutant                                                        | This study                |
| pEXG2::ΔPA2684                            | <i>tse5</i> deletion allele in pEXG2                                                                            | This study                |
| pEXG2::ΔPA2685                            | <i>vgrG4</i> deletion allele in pEXG2                                                                           | Whitney et al., 2014      |
| pEXG2::ΔPA4427                            | <i>sspB</i> deletion allele in pEXG2                                                                            | Silverman et al., 2013    |
| pPSV35-CV::PA0094                         | Expression vector for <i>eagT6</i>                                                                              | Whitney et al., 2015      |
| pPSV38-CV::PA4427                         | Expression vector for <i>sspB</i>                                                                               | Castang and Dove, 2012    |
| pSCRhaB2-CV::PA0093_D396A                 | Expression vector for <i>tse6</i> <sub>D396A</sub>                                                              | This study                |
| pSCRhaB2-CV::PA0093_D396A_ΔTMD-1_ΔTMD-2   | Expression vector for <i>tse6</i> <sub>D396A, Δ2-61, Δ180-222</sub>                                             | This study                |
| pSCRhaB2-CV::PA0093 <sub>tox</sub> _D396A | Expression vector for <i>tse6</i> <sub>282-430, D396A</sub>                                                     | This study                |
| pETDuet-1::PA0091_FLAG                    | Expression vector for C-terminally FLAG-tagged <i>vgrG1</i>                                                     | This study                |
| pETDuet-1::PA0093::PA0092                 | Co-expression vector for <i>tse6</i> and <i>tsi6</i>                                                            | Whitney et al., 2015      |
| pETDuet-1::PA0093_ΔTMD-1::PA0092          | Co-expression vector for <i>tse6</i> <sub>Δ2-61</sub> and <i>tsi6</i>                                           | This study                |
| pETDuet-1::PA0093_ΔTMD-2::PA0092          | Co-expression vector for <i>tse6</i> <sub>Δ180-222</sub> and <i>tsi6</i>                                        | This study                |
| pETDuet-1::PA0093_ΔTMD-1_ΔTMD-2::PA0092   | Co-expression vector for <i>tse6</i> <sub>Δ2-61, Δ180-222</sub> and <i>tsi6</i>                                 | This study                |
| pRSFDuet-1::PA0091::PA0094                | Expression vector for <i>vgrG1</i> and <i>eagT6</i>                                                             | Whitney et al., 2015      |
| pETDuet-1::PA0093_Q333A_D396A::PA0092     | Co-expression vector for <i>tse6</i> <sub>Q333A, D396A</sub> and <i>tsi6</i>                                    | This study                |
| pETDuet-1::PA0093Δtox::PA0092             | Co-expression vector for <i>tse6</i> <sub>1-281</sub> and <i>tsi6</i>                                           | This study                |
| pETDuet-1::PA0093_TMD-1::PA0094-V         | Co-expression vector for <i>tse6</i> <sub>2-61</sub> and <i>eagT6</i>                                           | This study                |
| pETDuet-1::PA0093_TMD-2::PA0094-V         | Co-expression vector for <i>tse6</i> <sub>180-222</sub> and <i>eagT6</i>                                        | This study                |
| pETDuet-1::PA0093_TMD-1::PA0094-V_V39Q    | Co-expression vector for <i>tse6</i> <sub>2-61</sub> and <i>eagT6</i> <sub>V39Q</sub>                           | This study                |
| pETDuet-1::PA0093_TMD-2::PA0094-V_V39Q    | Co-expression vector for <i>tse6</i> <sub>180-222</sub> and <i>eagT6</i> <sub>V39Q</sub>                        | This study                |
| pETDuet-1::PA0094-V                       | Expression vector for <i>eagT6</i>                                                                              | This study                |
| pETDuet-1::PA0094-V_V39Q                  | Expression vector for <i>eagT6</i> <sub>V39Q</sub>                                                              | This study                |
